# Supplementary material for: Long non-coding RNA GRASLND links melanoma differentiation and interferon-gamma response
Source: PubMed Central journal article supplement (PMC11466874; doi:10.3389/fmolb.2024.1471100), 2024-09-27

# Supplementary Figure S3 Uncropped Blots

## Figure 1B - Biological Triplicates

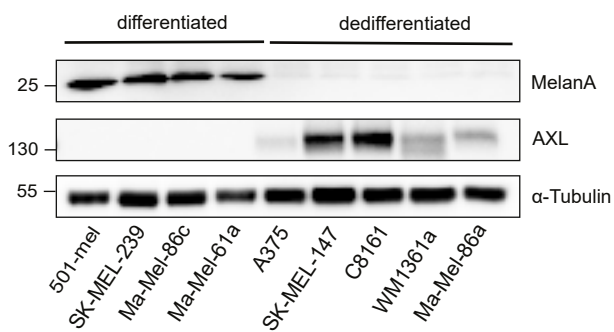

MelanA

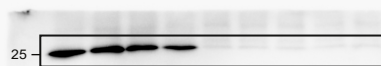

AXL

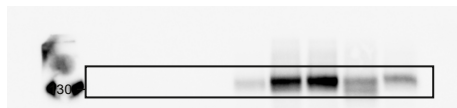

alpha-Tubulin

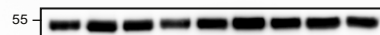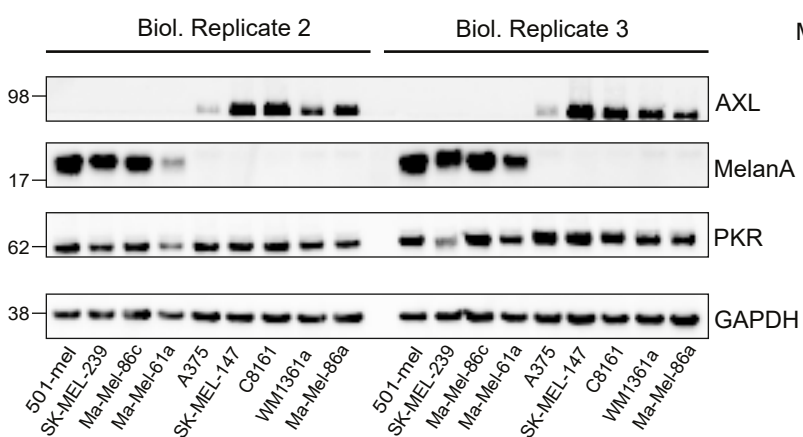

MelanA

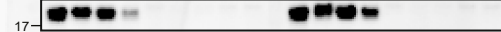

AXL

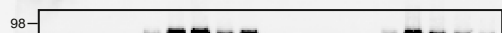

PKR

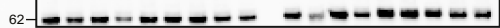

GAPDH

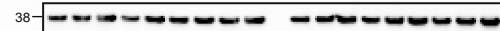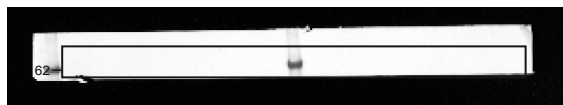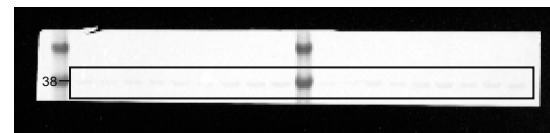

# Uncropped Blots

## Figure 2C - Biological Triplicates

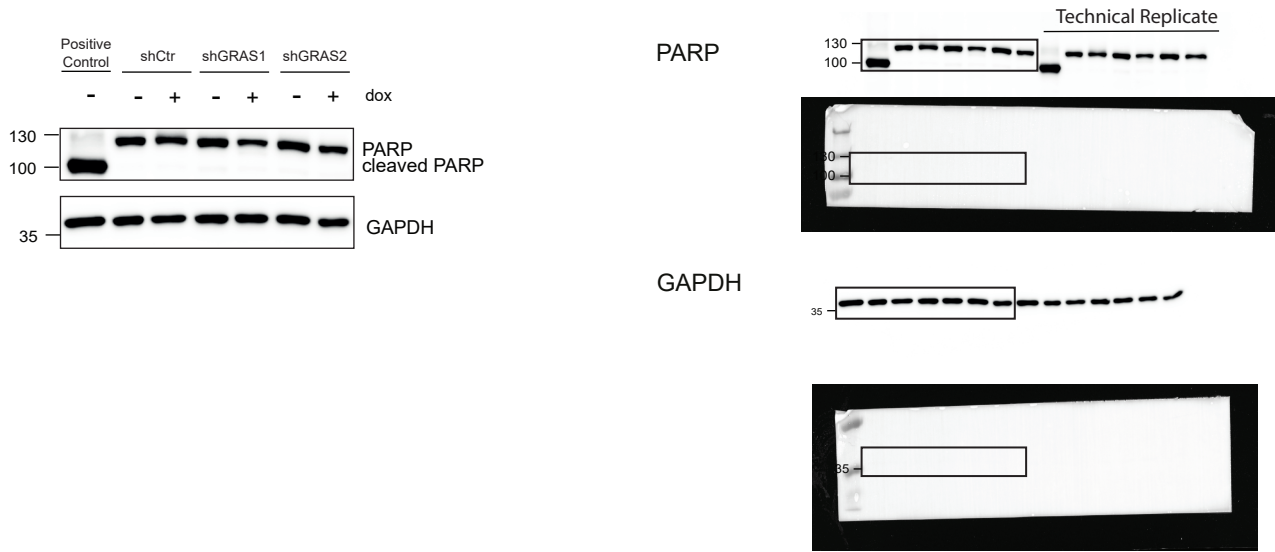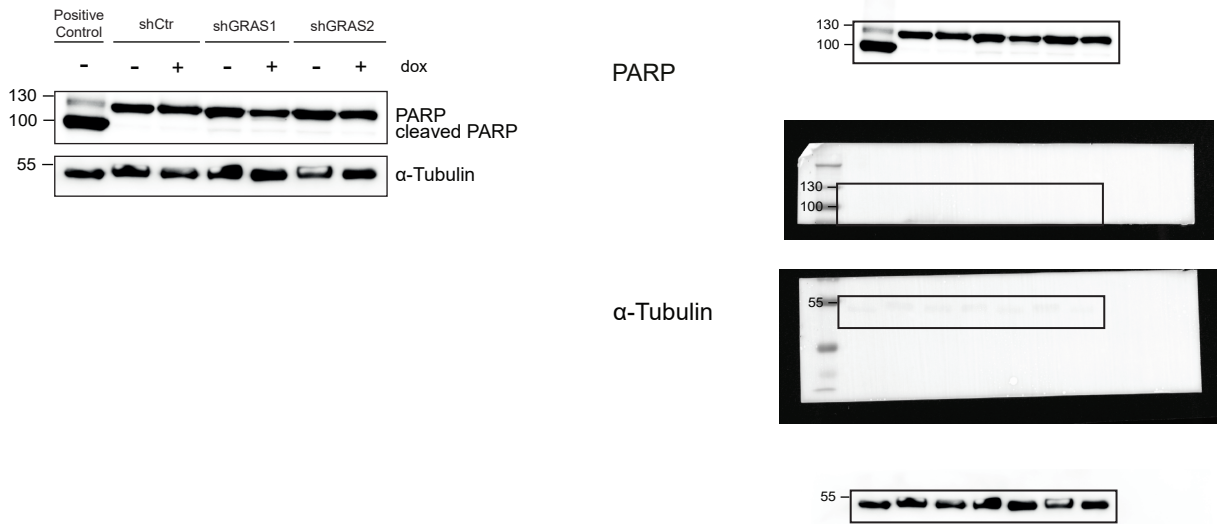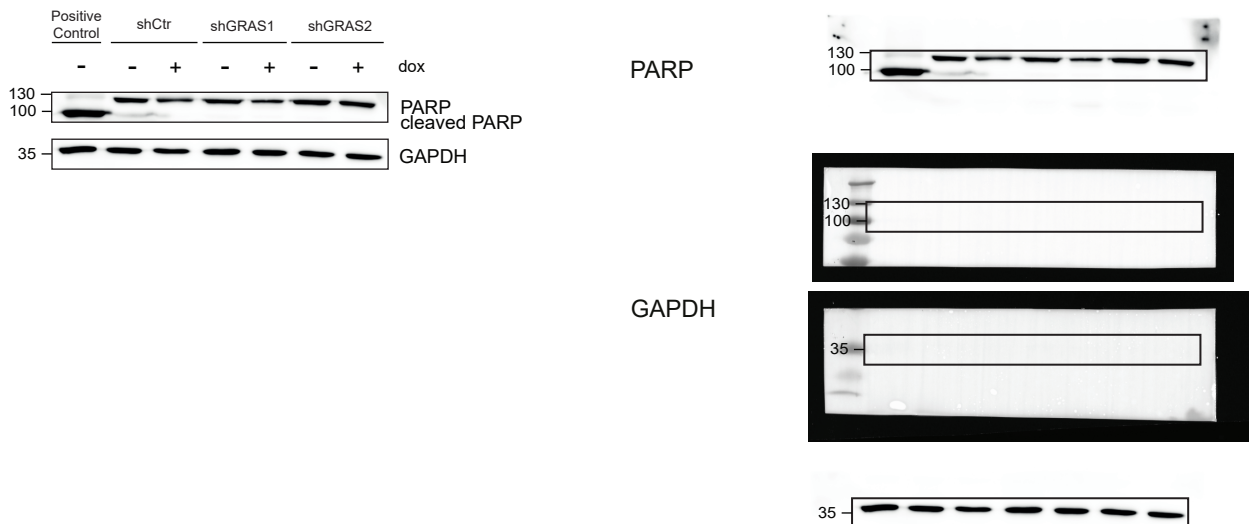

# Uncropped Blots

## Figure 3A (top) - Biological Triplicates

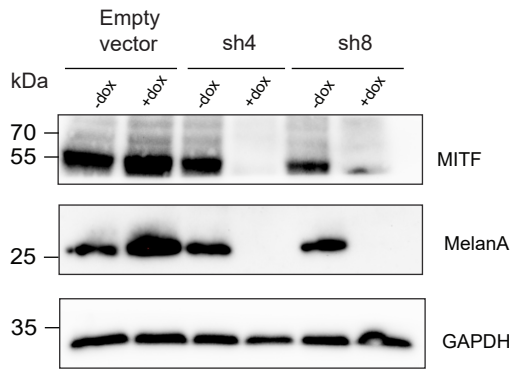

MITF

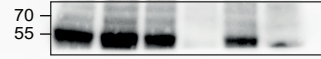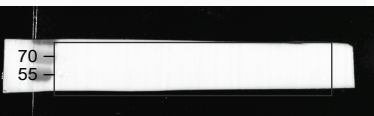

MelanA

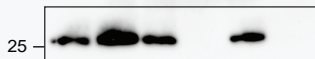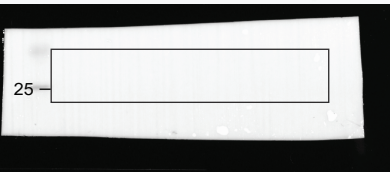

GAPDH

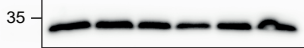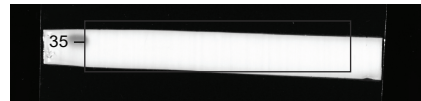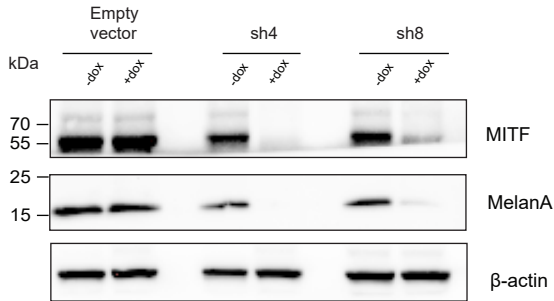

MITF

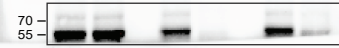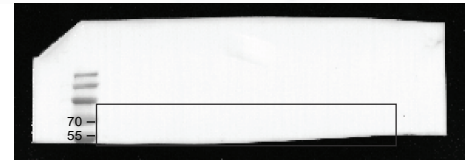

MelanA

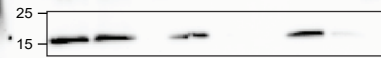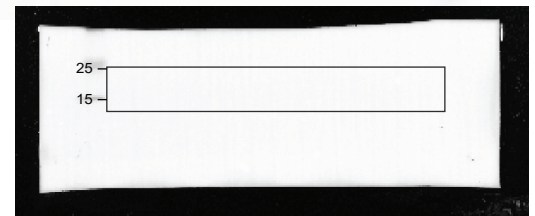

beta-actin

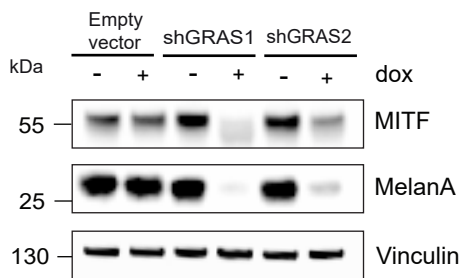

Vinculin

72h dox

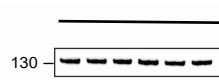

7 days dox  
(not shown in manuscript)

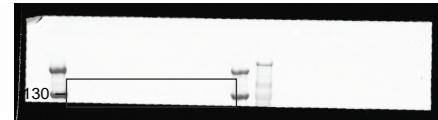

MITF

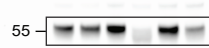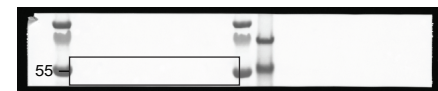

MelanA

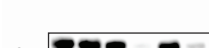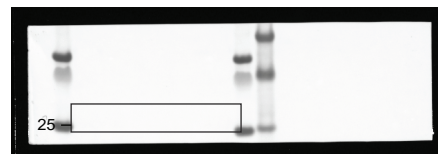

# Uncropped Blots

## Figure 3A (bottom) - Biological Triplicates

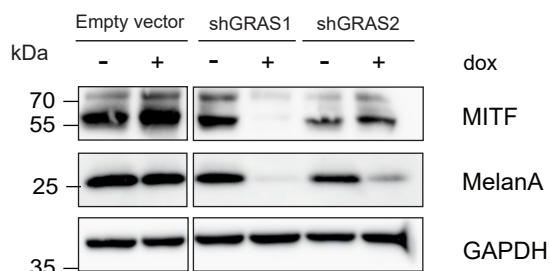

↑ Non-targeting (NT) shRNA control removed for the manuscript.

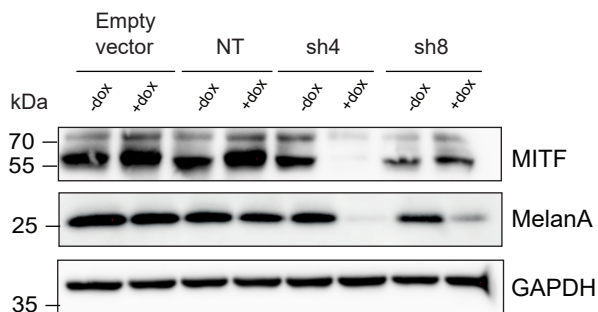

MITF

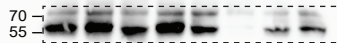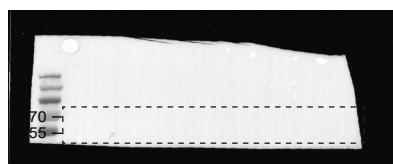

MelanA

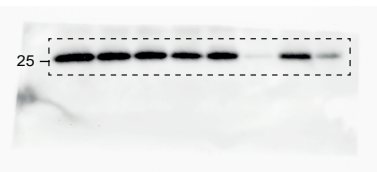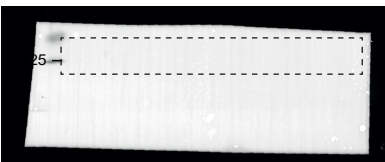

GAPDH

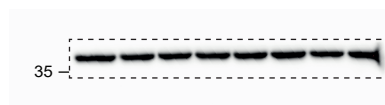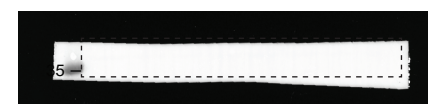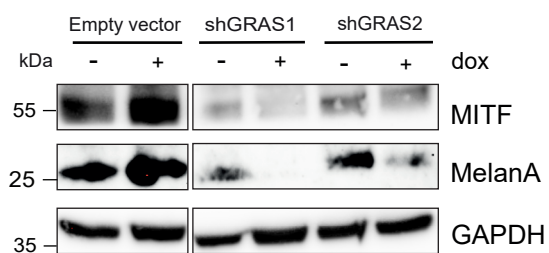

Non-targeting (NT) shRNA control removed for the manuscript.

MelanA

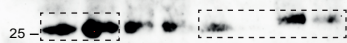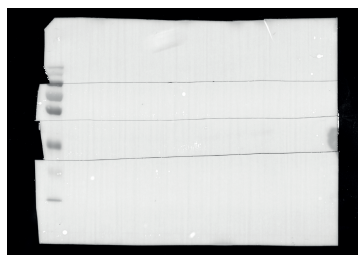

MITF

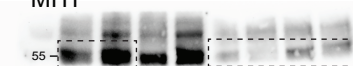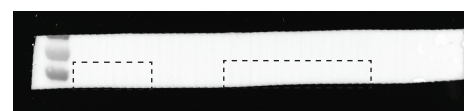

GAPDH

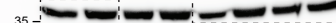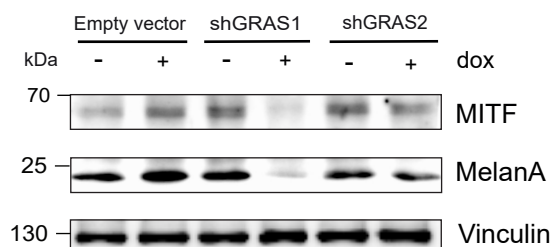

MITF

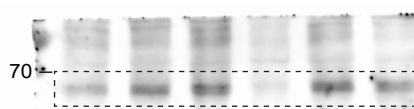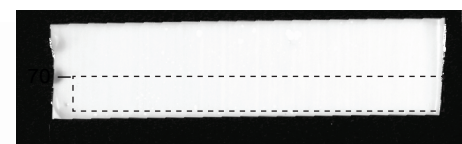

MelanA

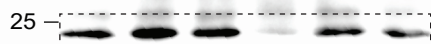

Vinculin

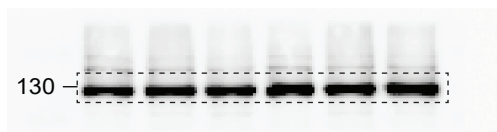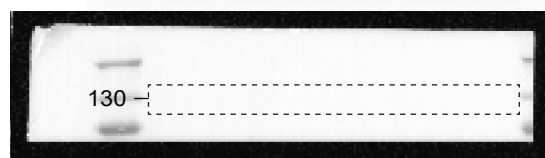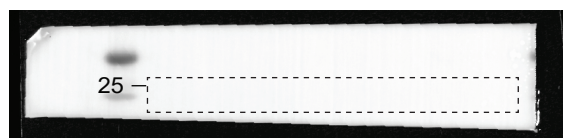



# Uncropped Blots

## Figure 5A - Biological Triplicates

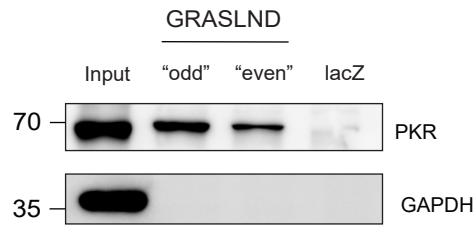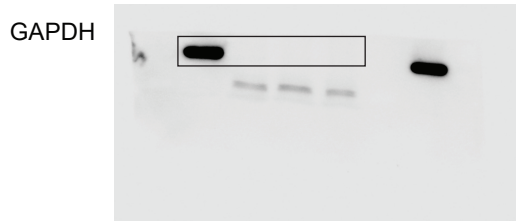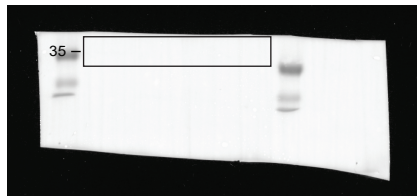

PKR

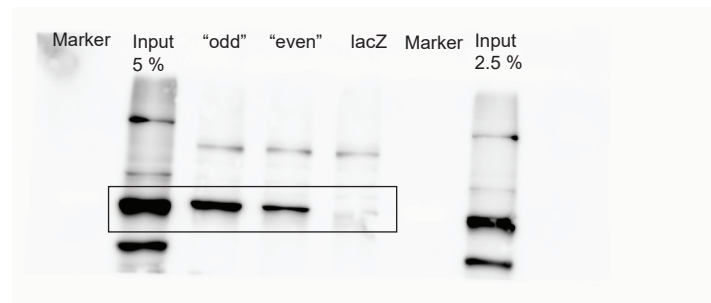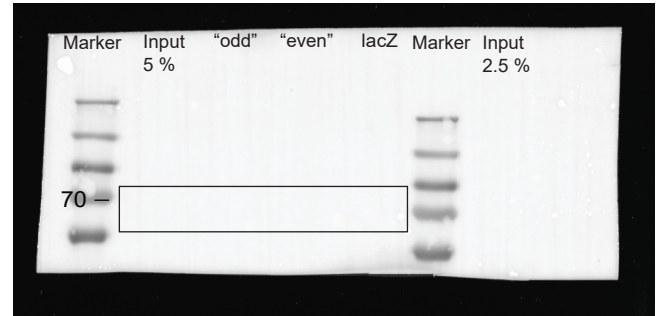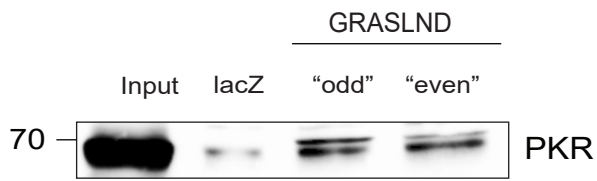

PKR

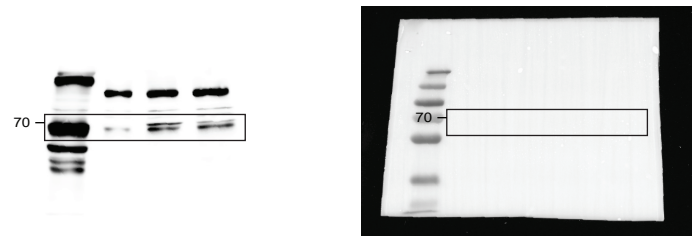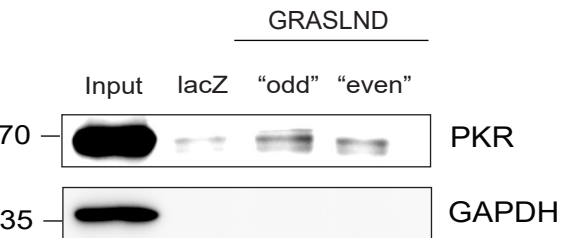

PKR

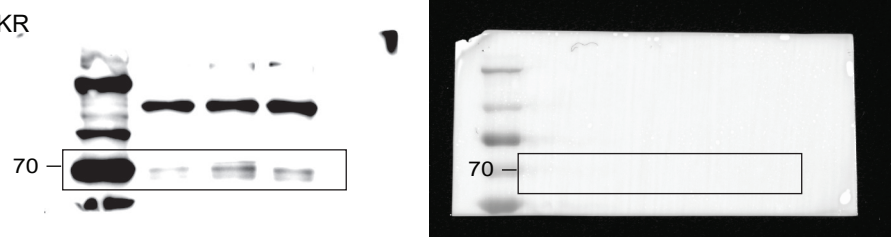

GAPDH

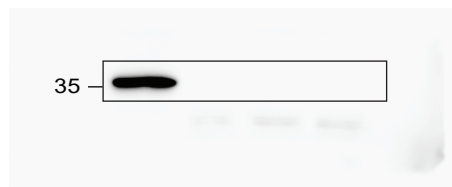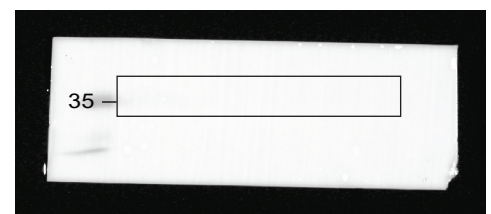

# Uncropped Blots

## Supplementary Figure S2C

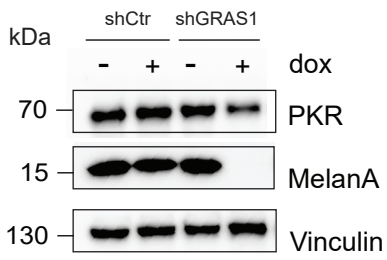

Vinculin

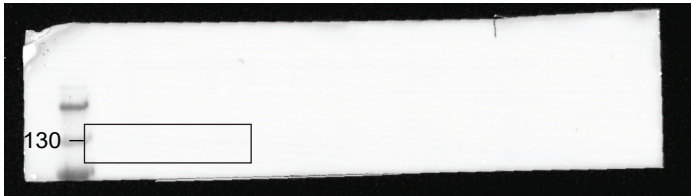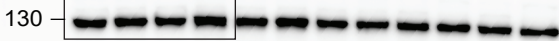

PKR

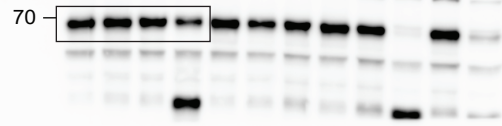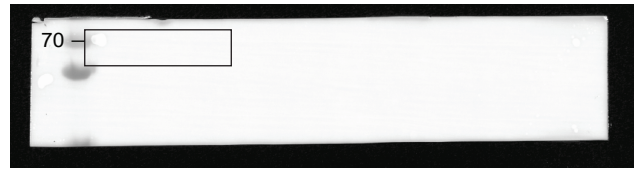

MelanA

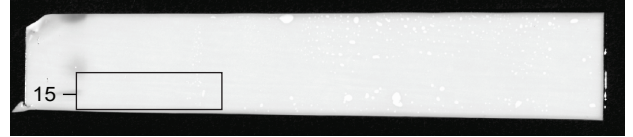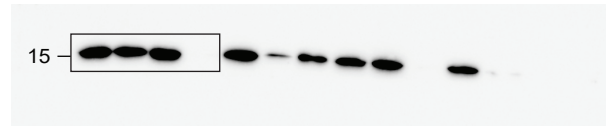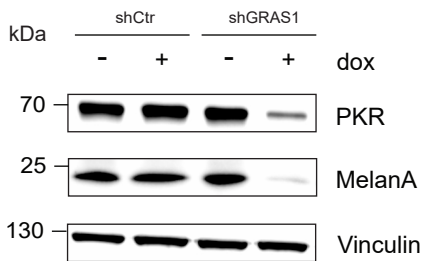

Vinculin

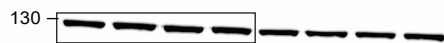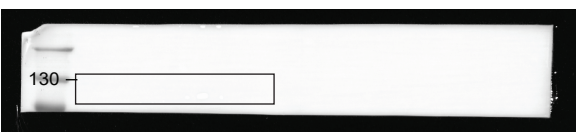

PKR

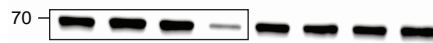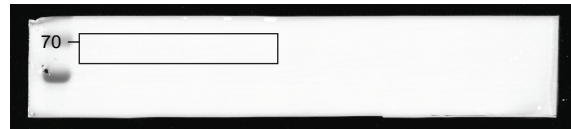

MelanA

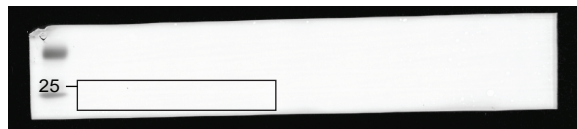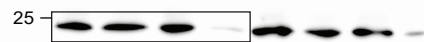

## Supplementary Figure S1B

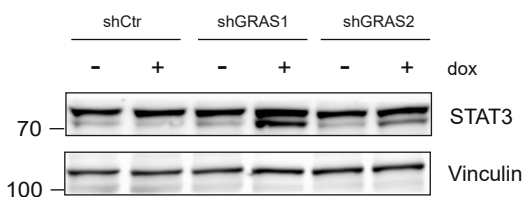

Vinculin

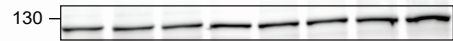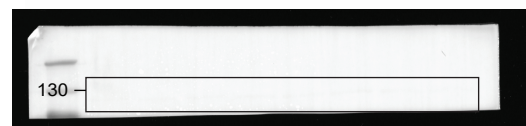

STAT3

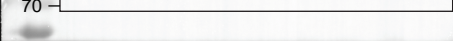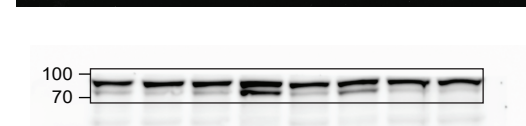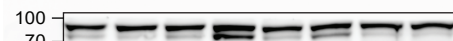

Supplement: Image3.pdf [file Image3.pdf]
