# Supplementary material for: Long non-coding RNA GRASLND links melanoma differentiation and interferon-gamma response
Source: PubMed Central journal article supplement (PMC11466874; doi:10.3389/fmolb.2024.1471100), 2024-09-27
Supplement: Image1.pdf [file Image1.pdf]

**A**

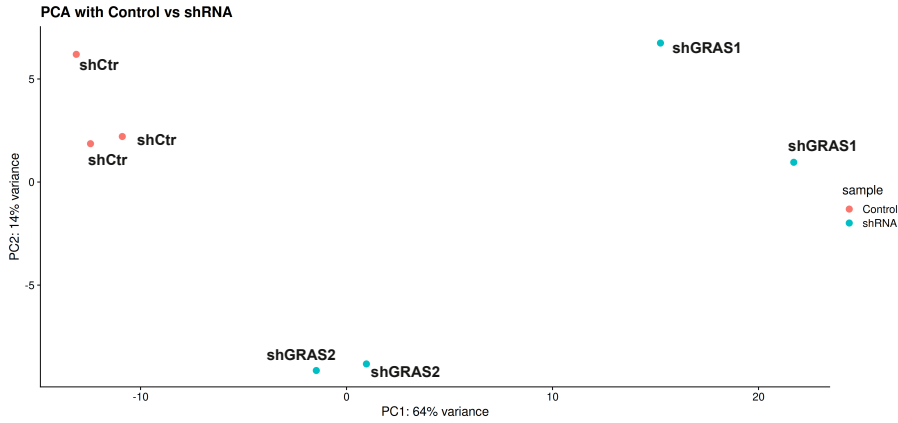

**B**

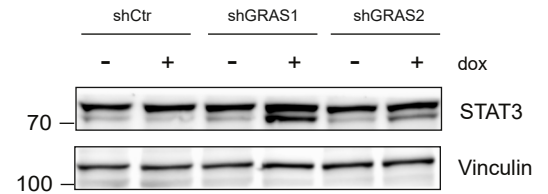

**Figure S1.** GRASLND knockdown induces melanoma phenotype switching **(A)** PCA plot of RNA sequencing samples. Red dots show three replicates of shCtrl samples, blue dots are shGRAS1 and shGRAS2 samples, with 2 replicates each. **(B)** Expression of STAT3 after GRASLND knockdown determined by western blotting. Vinculin, loading control. Representative data of two independent experiments.
