# Supplementary material for: Long non-coding RNA GRASLND links melanoma differentiation and interferon-gamma response
Source: PubMed Central journal article supplement (PMC11466874; doi:10.3389/fmolb.2024.1471100), 2024-09-27
Supplement: Image2.pdf [file Image2.pdf]

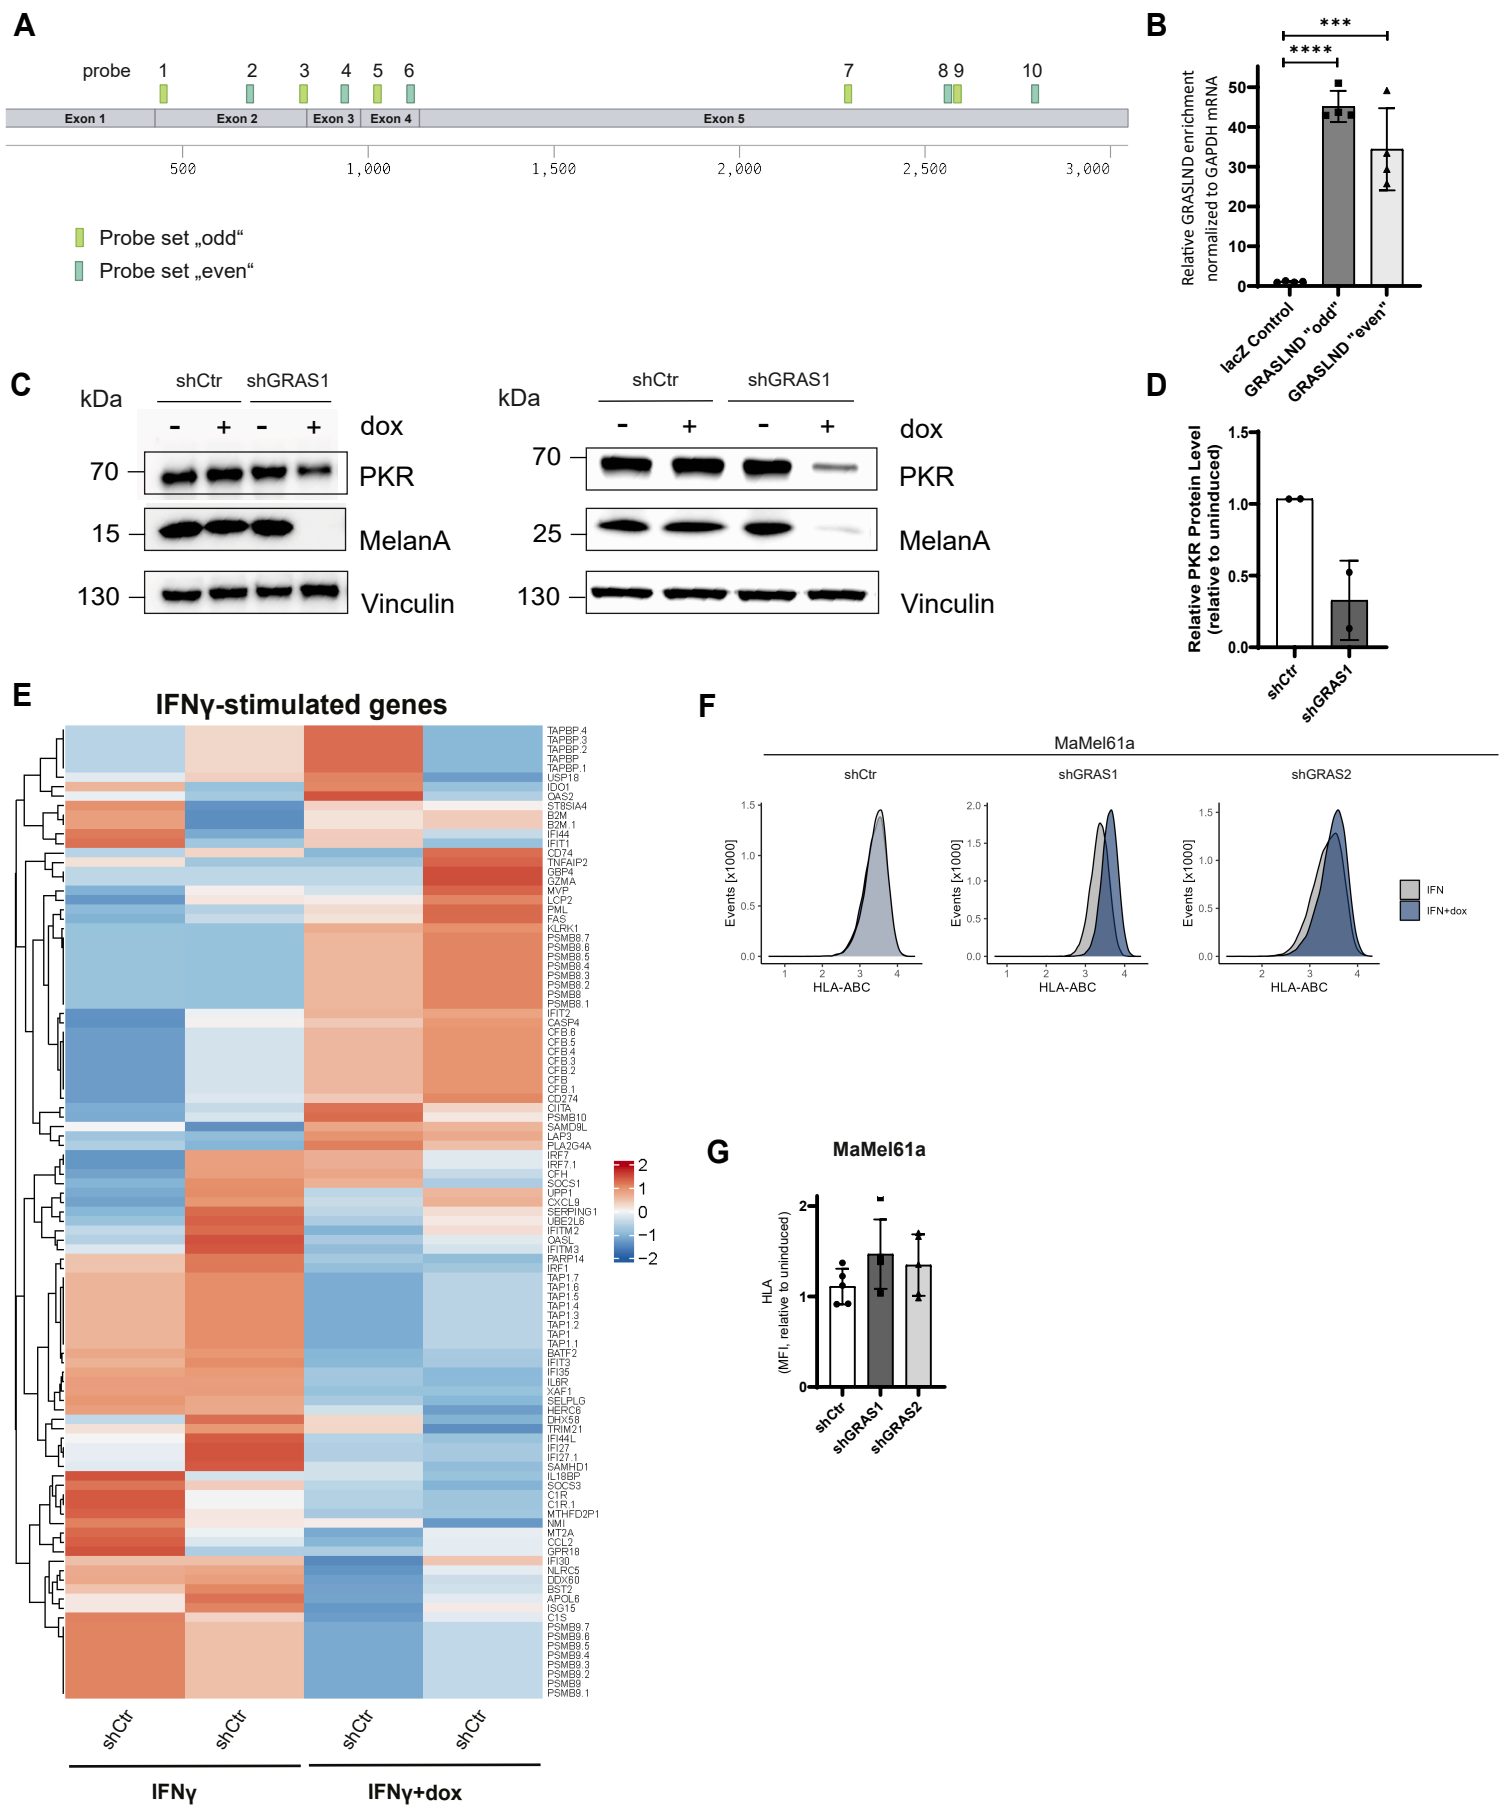

**Figure S2.** GRASLND impairs IFN $\gamma$  signalling. **(A)** Schematic overview of biotinylated DNA probe sets used in GRASLND RNA pulldown experiment. **(B)** GRASLND RNA pulldown using biotinylated DNA probes. GRASLND enrichment was validated by RT-qPCR.  $n=4$  independent biological replicates. **(C, D)** Expression of PKR after GRASLND knockdown in 501-mel cells induced with doxycycline (2  $\mu\text{g}/\text{mL}$ ) for 72 hours analyzed by Western blotting, Vinculin served as loading control. Quantification of PKR levels given as mean $\pm$ SD.  $n=2$  independent biological replicates. **(E)** Heatmap of differentially expressed IFN $\gamma$ -stimulated genes after IFN $\gamma$  treatment and doxycycline induction (2  $\mu\text{g}/\text{mL}$ ) for 6 days of 501Mel control shRNA (shCtrl) cells using RNA-sequencing. **(F)** HLA-I surface expression in MaMel61a cells determined by flow cytometry. Representative histograms of control and GRASLND knockdown cell lines from independent biological replicates ( $n=5$ ). **(G)** Fold change of MFI of IFN $\gamma$ -only to IFN $\gamma$ +dox treated cells given as mean $\pm$ SD in MaMel61a cells.
