# Supplementary material for: Long non-coding RNA GRASLND links melanoma differentiation and interferon-gamma response
Source: PubMed Central journal article supplement (PMC11466874; doi:10.3389/fmolb.2024.1471100), 2024-09-27
Supplement: Table1.pdf [file Table1.pdf]

**Table S1:** Primer list and sequences for RT-qPCR

| <b>Primer Name</b> | <b>Sequence (5'–3')</b>      |
|--------------------|------------------------------|
| GRASLND-Fwd        | aggattcaggggatgcacag         |
| GRASLND-Rev        | tgggctgaagatgagacgtt         |
| GAPDH-Fwd          | agccacatcgctcagacac          |
| GAPDH-Rev          | gcccaatacgaccaaattcc         |
| HPRT1-Fwd          | gaccagtcaacaggggacat         |
| HPRT1-Rev          | gtgtcaattatatcttcacaatcaa    |
| MLANA-Fwd          | gccactcttacaccacggct         |
| MLANA-Rev          | cagtaagactcccaggatcactactgtc |
| MALAT1-Fwd         | gaaggaaggagcgctaacga         |
| MALAT1-Rev         | taccaaccactcgctttccc         |
| PSMB9-Fwd          | atgtctcccaggagtgacag         |
| PSMB9-Rev          | gtccacaccggcagctgtaa         |
| TAP1-Fwd           | tccggaaaccgtgtctactt         |
| TAP1-Rev           | tcagggtttcgtacaggag          |
| STAT1-Fwd          | ttcacccttctagacttcagacc      |
| STAT1-Rev          | aggaacagagtagcaggaggga       |
