# Supplementary material for: Long non-coding RNA GRASLND links melanoma differentiation and interferon-gamma response
Source: PubMed Central journal article supplement (PMC11466874; doi:10.3389/fmolb.2024.1471100), 2024-09-27
Supplement: Table2.pdf [file Table2.pdf]

**Table S2:** Detailed quality control information of RNA sequencing samples.

| <b>Sample</b> | <b>Sample description</b>                         | <b>Total reads (millions)</b> | <b>Depth/Coverage</b> | <b>Mapping rate (% uniquely mapped reads)</b> |
|---------------|---------------------------------------------------|-------------------------------|-----------------------|-----------------------------------------------|
| lacZR1        | shCtr, dox-induced, Rep1                          | 41,8                          | 2,77                  | 85,99                                         |
| lacZR2        | shCtr, dox-induced, Rep2                          | 35,1                          | 2,32                  | 83,47                                         |
| lacZR3        | shCtr, induced, Rep3                              | 38,4                          | 2,54                  | 83,52                                         |
| lacZ_ifnDoxR1 | shCtr, IFN $\gamma$ -treated, dox-induced, Rep1   | 39,3                          | 2,59                  | 82,98                                         |
| lacZ_ifnR1    | shCtr, IFN $\gamma$ -treated, uninduced, Rep1     | 41,1                          | 2,70                  | 82,65                                         |
| lacZ_ifnR2    | shCtr, IFN $\gamma$ -treated, uninduced, Rep2     | 42,3                          | 2,79                  | 82,9                                          |
| lacZ_ifnDoxR2 | shCtr, IFN $\gamma$ -treated, dox-induced, Rep2   | 37,2                          | 2,46                  | 84,04                                         |
| sh4R1         | shGRAS1, dox-induced, Rep1                        | 34,8                          | 2,30                  | 84,99                                         |
| sh4R2         | shGRAS1, dox-induced, Rep2                        | 48,6                          | 3,21                  | 84,91                                         |
| sh4_ifnDoxR1  | shGRAS1, IFN $\gamma$ -treated, dox-induced, Rep1 | 34,0                          | 2,25                  | 81,28                                         |
| sh4_ifnDoxR2  | shGRAS1, IFN $\gamma$ -treated, dox-induced, Rep2 | 37,6                          | 2,48                  | 83,51                                         |
| sh4_ifnR1     | shGRAS1, IFN $\gamma$ -treated, uninduced, Rep1   | 38,1                          | 2,52                  | 82,69                                         |
| sh4_ifnR2     | shGRAS1, IFN $\gamma$ -treated, uninduced, Rep2   | 46,3                          | 3,05                  | 83,09                                         |
| sh8R1         | shGRAS1, dox-induced, Rep1                        | 33,1                          | 2,18                  | 85,8                                          |
| sh8R2         | shGRAS1, dox-induced, Rep2                        | 40,7                          | 2,69                  | 85,08                                         |
| sh8_ifnDoxR1  | shGRAS2, IFN $\gamma$ -treated, dox-induced, Rep1 | 27,8                          | 1,84                  | 84,57                                         |
| sh8_ifnDoxR2  | shGRAS2, IFN $\gamma$ -treated, dox-induced, Rep2 | 35,2                          | 2,34                  | 82,65                                         |
| sh8_ifnR1     | shGRAS2, IFN $\gamma$ -treated, uninduced, Rep1   | 40,7                          | 2,69                  | 82,14                                         |
| sh8_ifnR2     | shGRAS2, IFN $\gamma$ -treated, uninduced, Rep2   | 57,6                          | 3,82                  | 86,28                                         |
