# Supplementary material for: Long non-coding RNA GRASLND links melanoma differentiation and interferon-gamma response
Source: PubMed Central journal article supplement (PMC11466874; doi:10.3389/fmolb.2024.1471100), 2024-09-27
Supplement: Table3.pdf [file Table3.pdf]

**Table S3:** Biotinylated oligonucleotides list and sequences for RNA pulldown.

| <b>Probe</b>          | <b>Sequence (5'–3')</b> |
|-----------------------|-------------------------|
| Odd, probe 1          | tgtaggaatcaggggagtgt    |
| Odd, probe 2          | gcttcgcagatcttagattc    |
| Odd, probe 3          | agacgttacattccacattc    |
| Odd, probe 4          | atgagtagtcaccttccatg    |
| Odd, probe 5          | agaatctacggagcttgcac    |
| Even, probe 1         | ggtgaacagacagactttcc    |
| Even, probe 2         | gtactcaaccaggaacttct    |
| Even, probe 3         | ctctggcaggaaagtcttgt    |
| Even, probe 4         | catgcatagaagatccgggt    |
| Even, probe 5         | ccaaggccatattcaattg     |
| lacZ Control, probe 1 | aatgtgagcgagtaacaacc    |
| lacZ Control, probe 2 | attaagttgggtaacgccag    |
| lacZ Control, probe 3 | aataattcgcgtctggcctt    |
| lacZ Control, probe 4 | aattcagacggcaaacgct     |
| lacZ Control, probe 5 | atcttcagataactgccgt     |
