# Supplementary material for: Long non-coding RNA GRASLND links melanoma differentiation and interferon-gamma response
Source: PubMed Central journal article supplement (PMC11466874; doi:10.3389/fmolb.2024.1471100), 2024-09-27
Supplement: Table4.pdf [file Table4.pdf]

**Table S4:** Significance testing of GRASLND RNA expression was performed across nine melanoma cell lines (see Figure 1A). The mean differences in GRASLND expression measured by RT-qPCR were calculated from three biological replicates for each cell line, normalized to melanoma cell line A375 and compared against all other cell lines using a two-sided unpaired t-test. p-values marked in red indicate statistical significance, with a threshold of  $p < 0.05$ .

| Cell Line 1 | Cell Line 2 | p-value | Mean Cell Line 1 | Mean Cell Line 2 | t-Statistic |
|-------------|-------------|---------|------------------|------------------|-------------|
| 501-mel     | SK-MEL-239  | 0.00970 | 6.978            | 2.062            | 4.645       |
| 501-mel     | Ma-Mel-86c  | 0.00517 | 6.978            | 1.630            | 5.547       |
| 501-mel     | Ma-Mel-61a  | 0.00435 | 6.978            | 1.363            | 5.818       |
| 501-mel     | SK-MEL-147  | 0.00247 | 6.978            | 0.418            | 6.777       |
| 501-mel     | C8161       | 0.00197 | 6.978            | 0.044            | 7.200       |
| 501-mel     | WM1361a     | 0.00196 | 6.978            | 0.036            | 7.209       |
| 501-mel     | Ma-Mel-86a  | 0.00195 | 6.978            | 0.026            | 7.221       |
| SK-MEL-239  | Ma-Mel-86c  | 0.38569 | 2.062            | 1.630            | 0.973       |
| SK-MEL-239  | Ma-Mel-61a  | 0.19243 | 2.062            | 1.363            | 1.566       |
| SK-MEL-239  | SK-MEL-147  | 0.02207 | 2.062            | 0.418            | 3.635       |
| SK-MEL-239  | C8161       | 0.01027 | 2.062            | 0.044            | 4.569       |
| SK-MEL-239  | WM1361a     | 0.01012 | 2.062            | 0.036            | 4.588       |
| SK-MEL-239  | Ma-Mel-86a  | 0.00990 | 2.062            | 0.026            | 4.617       |
| Ma-Mel-86c  | Ma-Mel-61a  | 0.04752 | 1.630            | 1.363            | 2.826       |
| Ma-Mel-86c  | SK-MEL-147  | 0.00053 | 1.630            | 0.418            | 10.141      |
| Ma-Mel-86c  | C8161       | 0.00002 | 1.630            | 0.044            | 22.811      |
| Ma-Mel-86c  | WM1361a     | 0.00002 | 1.630            | 0.036            | 23.521      |
| Ma-Mel-86c  | Ma-Mel-86a  | 0.00002 | 1.630            | 0.026            | 24.974      |
| Ma-Mel-61a  | SK-MEL-147  | 0.00173 | 1.363            | 0.418            | 7.459       |
| Ma-Mel-61a  | C8161       | 0.00008 | 1.363            | 0.044            | 16.224      |
| Ma-Mel-61a  | WM1361a     | 0.00008 | 1.363            | 0.036            | 16.626      |
| Ma-Mel-61a  | Ma-Mel-86a  | 0.00006 | 1.363            | 0.026            | 17.403      |
| SK-MEL-147  | C8161       | 0.02686 | 0.418            | 0.044            | 3.417       |
| SK-MEL-147  | WM1361a     | 0.02446 | 0.418            | 0.036            | 3.520       |
| SK-MEL-147  | Ma-Mel-86a  | 0.02105 | 0.418            | 0.026            | 3.688       |
| C8161       | WM1361a     | 0.88638 | 0.044            | 0.036            | 0.152       |
| C8161       | Ma-Mel-86a  | 0.70266 | 0.044            | 0.026            | 0.410       |
| WM1361a     | Ma-Mel-86a  | 0.80940 | 0.036            | 0.026            | 0.258       |
