# Supplementary material for: Long non-coding RNA GRASLND links melanoma differentiation and interferon-gamma response
Source: PubMed Central journal article supplement (PMC11466874; doi:10.3389/fmolb.2024.1471100), 2024-09-27
Supplement: Table5.pdf [file Table5.pdf]

**Table S5:** Significance testing of MelanA protein expression was performed across nine melanoma cell lines (see Figure 1B, top). The mean differences in MelanA protein expression measured by western blotting, were calculated from three biological replicates for each cell line, normalized to melanoma cell line A375 and compared against all other cell lines using a two-sided unpaired t-test. p-values marked in red indicate statistical significance, with a threshold of  $p < 0.05$ .

| Cell Line 1 | Cell Line 2 | p-value | Mean Cell Line 1 | Mean Cell Line 2 | t-Statistic |
|-------------|-------------|---------|------------------|------------------|-------------|
| 501-mel     | SK-MEL-239  | 0.57002 | 20.987           | 16.838           | 0.618       |
| 501-mel     | Ma-Mel-86c  | 0.34574 | 20.987           | 14.699           | 1.068       |
| 501-mel     | Ma-Mel-61a  | 0.10012 | 20.987           | 10.118           | 2.131       |
| 501-mel     | SK-MEL-147  | 0.01677 | 20.987           | 0.939            | 3.953       |
| 501-mel     | C8161       | 0.01591 | 20.987           | 0.616            | 4.017       |
| 501-mel     | WM1361a     | 0.01642 | 20.987           | 0.779            | 3.979       |
| 501-mel     | Ma-Mel-86a  | 0.01598 | 20.987           | 0.669            | 4.011       |
| SK-MEL-239  | Ma-Mel-86c  | 0.70936 | 16.838           | 14.699           | 0.400       |
| SK-MEL-239  | Ma-Mel-61a  | 0.20639 | 16.838           | 10.118           | 1.507       |
| SK-MEL-239  | SK-MEL-147  | 0.02293 | 16.838           | 0.939            | 3.592       |
| SK-MEL-239  | C8161       | 0.02150 | 16.838           | 0.616            | 3.664       |
| SK-MEL-239  | WM1361a     | 0.02235 | 16.838           | 0.779            | 3.621       |
| SK-MEL-239  | Ma-Mel-86a  | 0.02161 | 16.838           | 0.669            | 3.659       |
| Ma-Mel-86c  | Ma-Mel-61a  | 0.21138 | 14.699           | 10.118           | 1.486       |
| Ma-Mel-86c  | SK-MEL-147  | 0.01052 | 14.699           | 0.939            | 4.537       |
| Ma-Mel-86c  | C8161       | 0.00972 | 14.699           | 0.616            | 4.642       |
| Ma-Mel-86c  | WM1361a     | 0.01026 | 14.699           | 0.779            | 4.570       |
| Ma-Mel-86c  | Ma-Mel-86a  | 0.00972 | 14.699           | 0.669            | 4.642       |
| Ma-Mel-61a  | SK-MEL-147  | 0.00024 | 10.118           | 0.939            | 12.414      |
| Ma-Mel-61a  | C8161       | 0.00021 | 10.118           | 0.616            | 12.801      |
| Ma-Mel-61a  | WM1361a     | 0.00029 | 10.118           | 0.779            | 11.819      |
| Ma-Mel-61a  | Ma-Mel-86a  | 0.00017 | 10.118           | 0.669            | 13.600      |
| SK-MEL-147  | C8161       | 0.55530 | 0.939            | 0.616            | 0.643       |
| SK-MEL-147  | WM1361a     | 0.79350 | 0.939            | 0.779            | 0.280       |
| SK-MEL-147  | Ma-Mel-86a  | 0.56358 | 0.939            | 0.669            | 0.629       |
| C8161       | WM1361a     | 0.79029 | 0.616            | 0.779            | -0.284      |
| C8161       | Ma-Mel-86a  | 0.90848 | 0.616            | 0.669            | -0.122      |
| WM1361a     | Ma-Mel-86a  | 0.84002 | 0.779            | 0.669            | 0.215       |
