# Supplementary material for: Long non-coding RNA GRASLND links melanoma differentiation and interferon-gamma response
Source: PubMed Central journal article supplement (PMC11466874; doi:10.3389/fmolb.2024.1471100), 2024-09-27
Supplement: Table7.pdf [file Table7.pdf]

**Table S7:** List of downregulated genes from HALLMARK pathways obtained from GSEA of RNA sequencing results after GRASLND knockdown in 501Mel cells. Striking genes related to observed phenotypes are highlighted in red.

| HALLMARK Pathway                 | Downregulated genes                                                                                                                                                                                                                                                                                                                                                                                                          |
|----------------------------------|------------------------------------------------------------------------------------------------------------------------------------------------------------------------------------------------------------------------------------------------------------------------------------------------------------------------------------------------------------------------------------------------------------------------------|
| HALLMARK_ESTROGEN_RESPONSE_EARLY | RBBP8, CCND1, FDFT1, SLC22A5, RRP12, RAB17, KAZN, MYC, UNC119, BAG1, NCOR2, SLC16A1, SVIL, NAV2, DHCR7, PPIF, MYBBP1A, SCARB1, FKBP4, ITPK1, NXT1, SLC7A2, FRK, FLNB, FASN, INPP5F, SLC1A4, ADCY1, FOXC1, ABLIM1, HES1, FHL2, SLC7A5, SLC26A2, GREB1                                                                                                                                                                         |
| HALLMARK_ESTROGEN_RESPONSE_LATE  | RBBP8, RNASEH2A, MOCS2, CCND1, FDFT1, IMPA2, SLC22A5, GALE, BAG1, NCOR2, SGK1, SLC16A1, ISG20, DHCR7, PPIF, SCARB1, GINS2, FKBP4, ITPK1, SORD, NXT1, UGDH, XRCC3, ST6GALNAC2, FRK, CDC6, FLNB, SLC1A4, FOXC1, CKB, SLC7A5, SLC26A2                                                                                                                                                                                           |
| HALLMARK_DNA_REPAIR              | PDE4B, CSTF3, ERCC3, TAF13, SMAD5, POLR1D, ADRM1, POLR2C, POLR1C, POLR2K, NT5C3A, MRPL40, UPF3B, POLR2G, GTF2H3, IMPDH2, SNAPC4, POLA1, POLB, SNAPC5, ERCC2, RFC5, POLR2H, APRT, POLR2J, SF3A3, PNP, SAC3D1, LIG1, POLR2E, POLD1, ADA, RNMT, RPA2, POLA2, RFC2, RAE1, NUDT21, NCBP2, NME1, ZWINT, TYMS, REV3L, POLR2F, TAF12, ALYREF, TMED2, POLR2D, SSRP1, UMPS, RAD51, GTF2H1, FEN1, PCNA, RALA, PRIM1, GTF2A2, RFC3, RFC4 |
| HALLMARK_FATTY_ACID_METABOLISM   | UROD, IDH3B, CRYZ, PDHA1, HCCS, HPGD, MDH2, CPOX, DHCR24, HADH, HSPH1, SDHD, MIF, METAP1, ACO2, HMGCS1, ERP29, ADSL, ACAT2, UROS, APEX1, ME1, NTHL1, ECHS1, SLC22A5, CBR1, ALDH9A1, ALDOA, SMS, IDI1, GCDH, HSP90AA1, MDH1, ACSL1, RDH11, FH, ECH, HSDL2, PRDX6, SUCLG1, UGDH, GLUL, MIX23, FASN, IDH1, LDHA, ODC1, H2AZ1                                                                                                    |
| HALLMARK_UV_RESPONSE_UP          | SPR, POLR2H, SLC6A8, CHKA, PDAP1, CASP3, GRPEL1, RAB27A, CNP, E2F5, EIF5, TARS1, IGFBP2, TGFBRAP1, ALDOA, ARRB2, HNRNPU, SIGMAR1, PPIF, DDX21, NUP58, ATP6V1C1, CTSV, AMD1, SOD2, H2AX, FKBP4, FEN1, CCNE1, CEBPG, STIP1, EIF2S3, ASNS, RFC4, TFRC, CHRNAS, PPA1, <b>CDK2</b>                                                                                                                                                |
| HALLMARK_CHOLESTEROL_HOMEOSTASIS | ACTG1, HMGCS1, ACAT2, ERRF1, CHKA, HMGCR, FDFT1, CBS, MVD, CYP51A1, FDPS, IDI1, LGMN, SQLE, DHCR7, ANXA5, PLSCR1, FASN, TMEM97, LGALS3, SCD, JAG1                                                                                                                                                                                                                                                                            |
| HALLMARK_GLYCOLYSIS              | AK4, MDH2, HMMR, MIF, RARS1, VEGFA, CENPA, CLN6, HSPA5, ERO1A, SLC25A13, ME1, TPII, CTH, GLCE, AKR1A1, PPIA, PYGB, GOT2, GALE, CYB5A, CACNA1H, TXN, RRAGD, ALDH9A1, SDC3,                                                                                                                                                                                                                                                    |

|                                          |                                                                                                                                                                                                                                                                                                                                                                                                                                                                                                                                                                                                                                                                                                          |
|------------------------------------------|----------------------------------------------------------------------------------------------------------------------------------------------------------------------------------------------------------------------------------------------------------------------------------------------------------------------------------------------------------------------------------------------------------------------------------------------------------------------------------------------------------------------------------------------------------------------------------------------------------------------------------------------------------------------------------------------------------|
|                                          | ALDOA, CHST6, AURKA, MDH1, ABCB6, PYGL, ISG20, SLC37A4, <b>CDK1</b> , GFPT1, ENO1, SLC25A10, POLR3K, PRPS1, PAXIP1, FKBP4, ME2, RPE, B4GALT2, DEPDC1, IDH1, MERTK, HK2, LDHA, MXII, MET, HOMER1                                                                                                                                                                                                                                                                                                                                                                                                                                                                                                          |
| HALLMARK_REACTIVE_OXYGEN_SPECIES_PATHWAY | ATOX1, NQO1, NDUFB4, PDLIM1, SOD1, HMOX2, FTL, GCLM, ERCC2, PRDX1, TXN, SRXN1, HHEX, SBNO2, PRDX6, TXNRD1, MBP, PRDX4, SOD2, ABCC1, GSR                                                                                                                                                                                                                                                                                                                                                                                                                                                                                                                                                                  |
| HALLMARK_UNFOLDED_PROTEIN_RESPONSE       | EEF2, EIF4A1, CNOT6, VEGFA, RPS14, HSPA5, EIF2S1, LSM4, FUS, ERO1A, EIF4A2, KHSRP, PDIA6, GEMIN4, TARS1, EXOSC9, SDAD1, MTREX, HSPA9, SPCS1, EXOSC4, XPOT, NOP14, EIF4E, IARS1, PARN, NHP2, EXOSC10, RRP9, NPM1, NOP56, H2AX, HSP90B1, ALDH18A1, SERP1, CEBPG, EXOSC2, PSAT1, DKC1, EIF4G1, ATF4, ASNS, SLC1A4, MTHFD2, EIF4A3, EIF4EBP1, NOLC1, SLC7A5                                                                                                                                                                                                                                                                                                                                                  |
| HALLMARK_MTORC1_SIGNALING                | GPI, PSMD14, HSPA5, PSMA4, HMGCS1, NUFIP1, NMT1, ERO1A, DDIT3, ME1, PPA1, BUB1, TPI1, PRDX1, HMGCR, PNP, PDAP1, WARS1, PLK1, ABCF2, CTH, CANX, PPIA, PSME3, CYP51A1, ALDOA, IMMT, SDF2L1, IDI1, PHGDH, AURKA, HSPA9, POLR3G, ELOVL6, GGA2, RDH11, EIF2S2, PSMD12, SLC37A4, LGMN, PNO1, SQLE, DHCR7, ACACA, NFKBIB, RRM2, ETF1, SHMT2, RRP9, TXNRD1, ENO1, TUBG1, HSPE1, HSPA4, GTF2H1, MCM2, HSP90B1, SERP1, SORD, HSPD1, DHFR, GMPS, UCHL5, PSAT1, STIP1, NUP205, UNG, IDH1, ACSL3, ASNS, HK2, SLC1A4, EEF1E1, LDHA, GSR, MCM4, TFRC, MTHFD2, CACYBP, TMEM97, TOMM40, PSPH, CCT6A, PSMG1, SCD, IFRD1, CDC25A, SLC7A5                                                                                    |
| HALLMARK_G2M_CHECKPOINT                  | KIF22, EZH2, BUB3, LBR, WRN, BIRC5, GSPT1, EWSR1, NASP, POLE, HMG2, SMC1A, SMARCC1, MKI67, CKS1B, MTF2, E2F2, SMC2, CDC7, MEIS2, XPO1, H2AZ2, G3BP1, SNRPD1, CUL4A, HSPA8, HMMR, ORC6, RAD23B, HIRA, TENT4A, DBF4, CENPA, NSD2, TRA2B, TFDP1, CHEK1, PRIM2, E2F1, SS18, SRSF2, AURKB, SMC4, MCM6, BUB1, BRCA2, RBM14, NUP98, E2F3, PLK1, CCND1, SRSF1, CDKN3, LIG3, SLC12A2, POLQ, KPNA2, CHAF1A, <b>MYC</b> , CDC25B, RPA2, POLA2, PRMT5, SFPQ, DTYMK, TACC3, HUS1, KIF23, AURKA, HNRNPD, CKS2, UBE2S, SYNCRIP, HNRNPU, FBXO5, KPNB1, ORC5, SQLE, <b>CDK1</b> , LMNB1, UPF1, INCENP, <b>CDK4</b> , CCNA2, ESPL1, AMD1, CDC45, EXO1, PTTG1, H2AX, GINS2, MCM2, MCM3, H2BC12, MAD2L1, DKC1, TNPO2, HMGA1, |

|                                    |                                                                                                                                                                                                                                                                                                                                                                                                                                                                                                                                                                                                                                                                                                                                                                                                                                                                                                                                                                                                         |
|------------------------------------|---------------------------------------------------------------------------------------------------------------------------------------------------------------------------------------------------------------------------------------------------------------------------------------------------------------------------------------------------------------------------------------------------------------------------------------------------------------------------------------------------------------------------------------------------------------------------------------------------------------------------------------------------------------------------------------------------------------------------------------------------------------------------------------------------------------------------------------------------------------------------------------------------------------------------------------------------------------------------------------------------------|
|                                    | CDC6, NCL, RAD54L, MYBL2, ODC1, NOLC1, H2AZ1, CDC25A, SLC7A5, SLC7A1                                                                                                                                                                                                                                                                                                                                                                                                                                                                                                                                                                                                                                                                                                                                                                                                                                                                                                                                    |
| HALLMARK_OXIDATIVE_PHOSPHORYLATION | NDUFS7, NDUFV1, ATP5MC2, MRPS11, TIMM9, NDUFS3, NDUFB4, BAX, SDHA, PDHX, UQCRC1, IDH3B, HTRA2, ATP5F1B, PDHA1, NDUFC1, COX5B, COX15, ATP5ME, ACADSB, HCCS, NDUFB6, NDUFC2, MFN2, COX7B, ETFA, MDH2, SLC25A3, NDUFA4, SDHD, ATP5F1C, SLC25A4, ATP5PO, ATP5MC1, CS, UQCRQ, ACO2, COX4I1, GPI, ATP6V0C, NDUFV2, NDUFA8, NDUFAB1, UQCRH, GLUD1, OXA1L, COX7C, TOMM70, SLC25A6, COX11, UQCRC2, ECHS1, UQCRFS1, NDUFA7, GRPEL1, NDUFS6, FDX1, OPA1, SUPV3L1, ATP5MC3, COX5A, AIFM1, IDH3A, GOT2, CYB5A, SDHB, ATP5MF, FXN, COX7A2L, MTRR, OAT, SLC25A11, MTX2, IMMT, SLC25A5, MDH1, POLR2F, HSPA9, CYC1, TIMM17A, TOMM22, MRPL11, FH, MRPS12, ECI1, ACAT1, PRDX3, VDAC2, MRPS30, MRPS15, MRPL34, ATP5F1D, PMPCA, PHB2, ATP5F1A, VDAC1, ATP6V1C1, TIMM13, LRPPRC, SUCLG1, LDHB, MRPL35, AFG3L2, IDH1, CYCS, LDHA, DLAT, TIMM50                                                                                                                                                                                 |
| HALLMARK_E2F_TARGETS               | BUB1B, KIF22, EZH2, CCP110, RFC1, CDCA8, LBR, SMC3, BIRC5, GSPT1, CNOT9, NASP, DCK, ZW10, POLE, DCLRE1B, SMC1A, DNMT1, TBRG4, MKI67, CKS1B, RPA1, MLH1, XPO1, DEK, EED, PMS2, HELLS, HMMR, ORC6, ORC2, PAICS, DSCC1, TRA2B, ANP32E, NUP153, CHEK1, EIF2S1, PRIM2, SRSF2, AURKB, SMC4, MCM6, BRCA2, RNASEH2A, RAD1, MRE11, PLK1, LIG1, CIT, SRSF1, DLGAP5, CDKN3, POLD1, MMS22L, USP1, GINS1, E2F8, XRCC6, EXOSC8, ASF1B, SLBP, KPNA2, MYC, PNN, CDC25B, RPA2, POLA2, SHMT1, AK2, RFC2, NUDT21, PHF5A, NME1, TACC3, HUS1, AURKA, HNRNPD, ATAD2, CKS2, UBE2S, KIF18B, SYNCRIP, IPO7, CENPM, SNRPB, DONSON, TK1, NAP1L1, CTPS1, RAN, GINS3, CDK1, LMNB1, MSH2, RRM2, CDK4, BRCA1, ESPL1, WEE1, PRKDC, TUBB, UBE2T, SSRP1, TUBG1, NUP107, NOP56, PTTG1, PRPS1, PRDX4, H2AX, POP7, MCM2, PCNA, CSE1L, CCNE1, DCTPP1, MELK, TIPIN, MCM3, MCM7, MAD2L1, RAD51AP1, PSMC3IP, DEPDC1, CHEK2, POLD2, NUP205, UNG, HMGA1, LYAR, GINS4, RFC3, MCM4, PA2G4, TFRC, MTHFD2, MYBL2, RANBP1, TRIP13, NOLC1, H2AZ1, CDC25A |
| HALLMARK_MYC_TARGETS_V2            | TCOF1, DDX18, TFB2M, PES1, NOC4L, PLK1, RRP12, SUPV3L1, GRWD1, PPA1, MYC, RABEPK, PPRC1, NOP16, SLC19A1, PUS1, WDR74, UTP20, FARSA, GNL3, IMP4, BYSL, MYBBP1A, RCL1, CDK4, AIMP2, RRP9, NPM1, WDR43, SLC29A2, NOP56, HSPE1, IPO4, DCTPP1, SORD, NOP2,                                                                                                                                                                                                                                                                                                                                                                                                                                                                                                                                                                                                                                                                                                                                                   |

|                         |                                                                                                                                                                                                                                                                                                                                                                                                                                                                                                                                                                                                                                                                                                                                                                                                                                                                                                                                                                                                                                                                                                                                                                                                         |
|-------------------------|---------------------------------------------------------------------------------------------------------------------------------------------------------------------------------------------------------------------------------------------------------------------------------------------------------------------------------------------------------------------------------------------------------------------------------------------------------------------------------------------------------------------------------------------------------------------------------------------------------------------------------------------------------------------------------------------------------------------------------------------------------------------------------------------------------------------------------------------------------------------------------------------------------------------------------------------------------------------------------------------------------------------------------------------------------------------------------------------------------------------------------------------------------------------------------------------------------|
|                         | HSPD1, PRMT3, NDUFAF4, MRTO4, UNG, HK2, MCM4, PA2G4, TMEM97, SRM, NOLC1                                                                                                                                                                                                                                                                                                                                                                                                                                                                                                                                                                                                                                                                                                                                                                                                                                                                                                                                                                                                                                                                                                                                 |
| HALLMARK_MYC_TARGETS_V1 | <p>EPRS1, BUB3, EIF3D, SNRPB2, RACK1, PCBP1, SRSF7, NCBP1, GSPT1, SRSF3, SF3B3, PSMA1, PSMD1, PSMA2, PSMB2, SMARCC1, MRPS18B, CBX3, MRPL23, IMPDH2, STARD7, XPO1, DEK, G3BP1, ABCE1, EIF4A1, SNRPD1, VBP1, SLC25A3, ILF2, EIF1AX, CSTF2, SF3A1, RPS10, RAD23B, SSBP1, ORC2, EIF4G2, PSMD14, RRM1, PSMA4, TRA2B, PSMD7, DDX18, TFDP1, PSMD3, RNPS1, EIF2S1, NDUFAB1, SNRPD3, UBE2E1, SRSF2, APEX1, MCM6, TOMM70, RPS5, HNRNPR, ACP1, CCT3, CCT7, SRSF1, CNBP, HNRNPC, LSM7, ERH, USP1, CANX, RPL6, PPIA, SSB, UBA2, KARS1, XRCC6, COX5A, AP3S1, PRPF31, KPNA2, GOT2, <b>MYC</b>, PPM1G, EIF4H, EEF1B2, TARDBP, RPL22, EIF3J, NOP16, PSMA7, NCBP2, SNRPG, NME1, PABPC1, FBL, RPS6, HNRNPD, TYMS, HDAC2, SERBP1, CYC1, SYNCRIP, HNRNPU, KPNB1, TCP1, XPOT, CCT4, EIF2S2, RPS3, RPLP0, GNL3, NAP1L1, EIF4E, IARS1, PRDX3, CTPS1, RAN, NHP2, RSL1D1, TRIM28, DDX21, PHB2, <b>CDK4</b>, SET, PTGES3, ETF1, RPS2, AIMP2, VDAC1, SNRPA1, RRP9, CCNA2, CCT5, HSP90AB1, SRPK1, NPM1, NOP56, HSPE1, CDC45, RUVBL2, RPL14, PRDX4, CCT2, TUFM, MCM2, PCNA, GLO1, MCM7, SNRPA, HSPD1, MAD2L1, POLD2, PABPC4, C1QBP, EXOSC7, HNRNPA1, PRPS2, LDHA, RFC4, MCM4, PA2G4, SRM, RANBP1, ODC1, NOLC1, IFRD1, H2AZ1, CDK2</p> |
