# Supplementary material for: Long non-coding RNA GRASLND links melanoma differentiation and interferon-gamma response
Source: PubMed Central journal article supplement (PMC11466874; doi:10.3389/fmolb.2024.1471100), 2024-09-27
Supplement: Table8.pdf [file Table8.pdf]

**Table S8:** List of upregulated genes from HALLMARK pathways obtained from GSEA of RNA sequencing results after GRASLND knockdown in 501Mel cells. Striking genes related to observed phenotypes are highlighted in red.

| HALLMARK Pathway                           | Upregulated genes                                                                                                                                                                                                                                                                                                                   |
|--------------------------------------------|-------------------------------------------------------------------------------------------------------------------------------------------------------------------------------------------------------------------------------------------------------------------------------------------------------------------------------------|
| HALLMARK_APICAL_JUNCTION                   | GNAI1, IRS1, JUP, YWHAH, GNAI2, ITGA10, CDH3, ITGA9, SYK, TRO, CERCAM, FSCN1, ADAM23, MYH9, PBX2, CTNNA1, TMEM8B, ICAM1, ACTN4, B4GALT1, VASP, STX4, NECTIN2, NECTIN3, CRAT, MAPK11, ITGA3, BMP1, MSN, SKAP2, SGCE, SPEG, ITGB1, AKT3, PARVA, MAPK14, THBS3, RSU1, CTNND1, CD99, NECTIN1, IKBKG, SHC1, CD276, NLGN2, ZYX, TJP1, NF1 |
| HALLMARK_COAGULATION                       | A2M, MMP14, S100A13, CTSB, GSN, LRP1, USP11, MSRB2, SPARC, CRIP2, KLF7, FURIN, TIMP1, BMP1, CPQ, TF, ANXA1                                                                                                                                                                                                                          |
| HALLMARK_EPITHELIAL_MESENCHYMAL_TRANSITION | SNTB1, FUCA1, MMP14, MATN3, LGALS1, LRP1, CD59, CCN2, TNFAIP3, SPARC, TPM4, WIPF1, COPA, TIMP1, SGCB, LAMC1, P3H1, BMP1, SERPINE2, COL6A2, ITGB5, RHOB, ITGB1, ECM1, <b>TGFBI</b> , EMP3, PCOLCE, GADD45B                                                                                                                           |
| HALLMARK_IL6_JAK_STAT3_SIGNALING           | A2M, IL6ST, PDGFC, STAT2, IFNAR1, TNFRSF21, IL10RB, HMOX1, <b>STAT3</b> , TNFRSF1A, SOCS3, STAM2, <b>TGFBI</b> , PIM1, IRF9, TYK2, IL13RA1, ACVR1B                                                                                                                                                                                  |
| HALLMARK_WNT_BETA_CATENIN_SIGNALING        | PTCH1, GNAI1, NKD1, PPARD, LEF1, NUMB, HDAC5, AXIN2, NCSTN, HEY1, HEY2, FRAT1                                                                                                                                                                                                                                                       |
| HALLMARK_COMPLEMENT                        | CBLB, MMP14, S100A13, DOCK9, CTSB, GNAI2, RASGRP1, LRP1, DOCK4, CD59, TNFAIP3, PLA2G4A, GNG2, CD55, CASP4, PDP1, TIMP1, STX4, CALM3, DGKH, PSEN1, CD46, LIPA, CPQ, CASP7, USP8, VCIPI1, PIM1, CDK5R1, DGKG, USP15, EHD1, CASP9, BRPF3                                                                                               |
| HALLMARK_KRAS_SIGNALING_UP                 | GPRC5B, FUCA1, JUP, ETV1, TMEM158, ABCB1, TFPI, ETV5, TNFAIP3, CCSER2, SDCCAG8, RABGAP1L, HDAC9, GLRX, MAP7                                                                                                                                                                                                                         |
| HALLMARK_TNFA_SIGNALING_VIA_NFKB           | <b>SMAD3</b> , PNRC1, NR4A2, TSC22D1, CEBPD, KLF9, SLC2A3, IL6ST, FOSL2, NFIL3, TNFAIP3, LITAF, BCL6, NFAT5, BCL2A1, CFLAR, ICAM1, B4GALT1, TANK, MXD1, KDM6B, DRAM1, ZFP36, SNN, PPP1R15A, SERPINB8, RHOB, PDLIM5, NFKB2, SOCS3, FJX1, PER1, DNAJB4, GADD45B, BTG1, EHD1, KLF6, TIPARP, PHLDA1, TNIP1                              |
| HALLMARK_KRAS_SIGNALING_DN                 | PTPRJ, NR4A2, YPEL1, CPEB3, SLC29A3, ADRA2C, MAST3, COQ8A, PDK2, MFSD6, PLAG1, IDUA, SNN, CHST2                                                                                                                                                                                                                                     |
| HALLMARK_HYPOXIA                           | SLC2A1, PNRC1, CAV1, PAM, STC1, SLC2A3, HS3ST1, TES, SDC2, WSB1, CCN2, FOSL2, NFIL3, TNFAIP3, MT2A, NDRG1, CITED2, MYH9, P4HA2, CCNG2, KLF7, GLRX, VHL, IDS, RORA, HMOX1, NAGK, ZFP36, PPP1R15A, CHST2, B3GALT6, MAP3K1, ENO3, GBE1, ZNF292, GAA, KLHL24, PIM1, PDK1                                                                |
| HALLMARK_IL2_STAT5_SIGNALING               | PTCH1, AHNAK, SNX9, SLC39A8, BMPR2, AHR, ABCB1, SYT11, CTLA4, SPRY4, SLC2A3, NFIL3, NDRG1, SNX14, CDC42SE2, RABGAP1L, ITGA6, FURIN, TNFRSF21, MXD1, ALCAM, RORA, SLC1A5, IFITM3, IKZF4, ITIH5, PRAF2, EOMES, TWSG1, RHOB, ENO3, SOCS2, ECM1                                                                                         |

|                          |                                                                                                                                                                                                                                                                                                                          |
|--------------------------|--------------------------------------------------------------------------------------------------------------------------------------------------------------------------------------------------------------------------------------------------------------------------------------------------------------------------|
| HALLMARK_MITOTIC_SPINDLE | KLC1, PREX1, ARL8A, KIFAP3, SORBS2, GSN, CYTH2, SPTBN1, DOCK4, PKD2, SUN2, NEDD9, CLIP2, FSCN1, DYNLL2, SPTAN1, PLEKHG2, MYH9, CAPZB, CSNK1D, NUMA1, AKAP13, ARHGAP27, ARHGAP5, HDAC6, ARFGEF1, ACTN4, ARHGAP29, RASA2, CLIP1, RICTOR, BCAR1, CNTRL, ALS2, ABI1, CDC42, SOS1, KIF3C, PDLIM5, CD2AP, STK38L, RAB3GAP1     |
| HALLMARK_P53_PATHWAY     | FUCA1, MXD4, TSC22D1, SLC7A11, PTPN14, S100A10, ERCC5, PLXNB2, SLC35D1, NDRG1, <b>CDKN2B</b> , IP6K2, COQ8A, PITPNC1, ZFP36L1, PERP, SERTAD3, MXD1, PRMT2, PPM1D, BLCAP, DRAM1, EPHA2, HMOX1, TSPYL2, PPP1R15A, CSRNP2, RALGDS, TXNIP, HEXIM1, TGFB1, ABCC5, CDK5R1, TRIB3, JAG2, BTG1, APAF1, RAB40C, DDB2, MKNK2, DEF6 |
| HALLMARK_HEME_METABOLISM | RANBP10, SLC2A1, ATP6V0A1, SLC7A11, CTSB, SIDT2, EZH1, LRP10, LMO2, OPTN, TMCC2, NARF, P4HA2, BCAM, CAT, AGPAT4, ENDOD1, YPEL5, TMEM9B, ELL2, MARK3, KHNYN, PSMD9, LPIN2, NEK7, ACP5, CIR1, EIF2AK1, ARL2BP, RBM5, ADD1, SEC14L1, ALDH6A1, MGST3                                                                         |
